# Supplementary material
Source: Springer Nature journal article supplement (https://www.springermedizin.de/resource/supplementary/12970_2013_415_MOESM2_ESM.pdf/9593906)

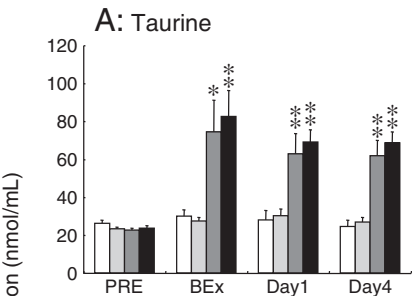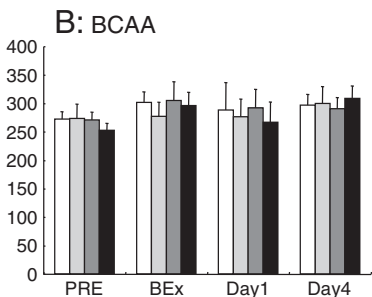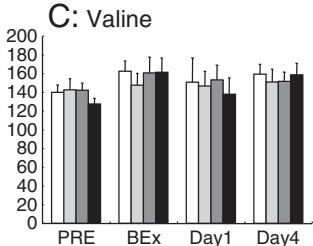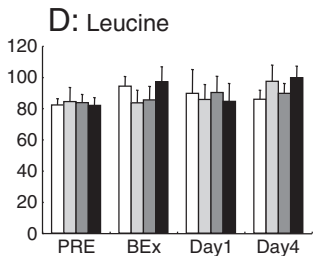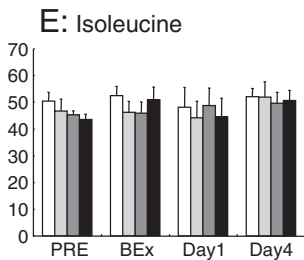

**PLCB**

**BA**

**TAU**

**COMB**

Supplement: MOESM2 [file 9593906]
